# Supplementary material for: Conformational Switch Regulates the DNA Cytosine Deaminase Activity of Human APOBEC3B
Source: PubMed Central journal article supplement (PMC5727031; doi:10.1038/s41598-017-17694-3), 2017-12-12

Figure 6

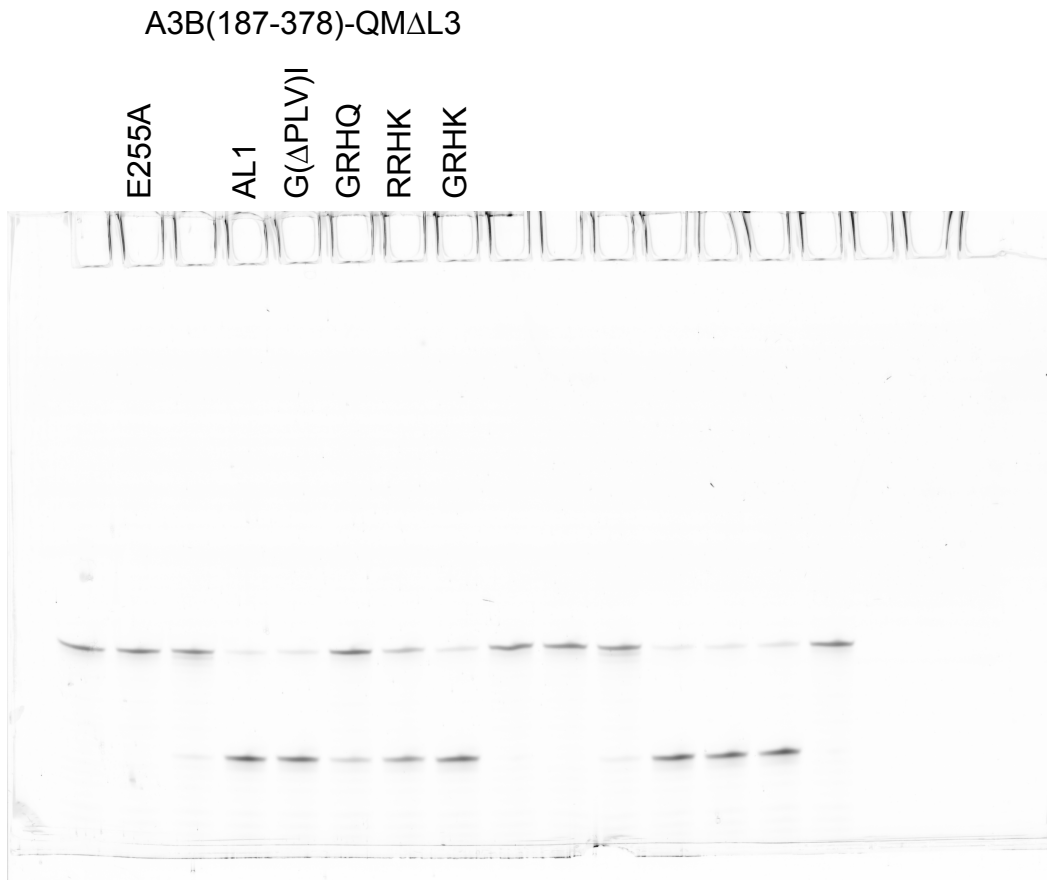

Figure S5A

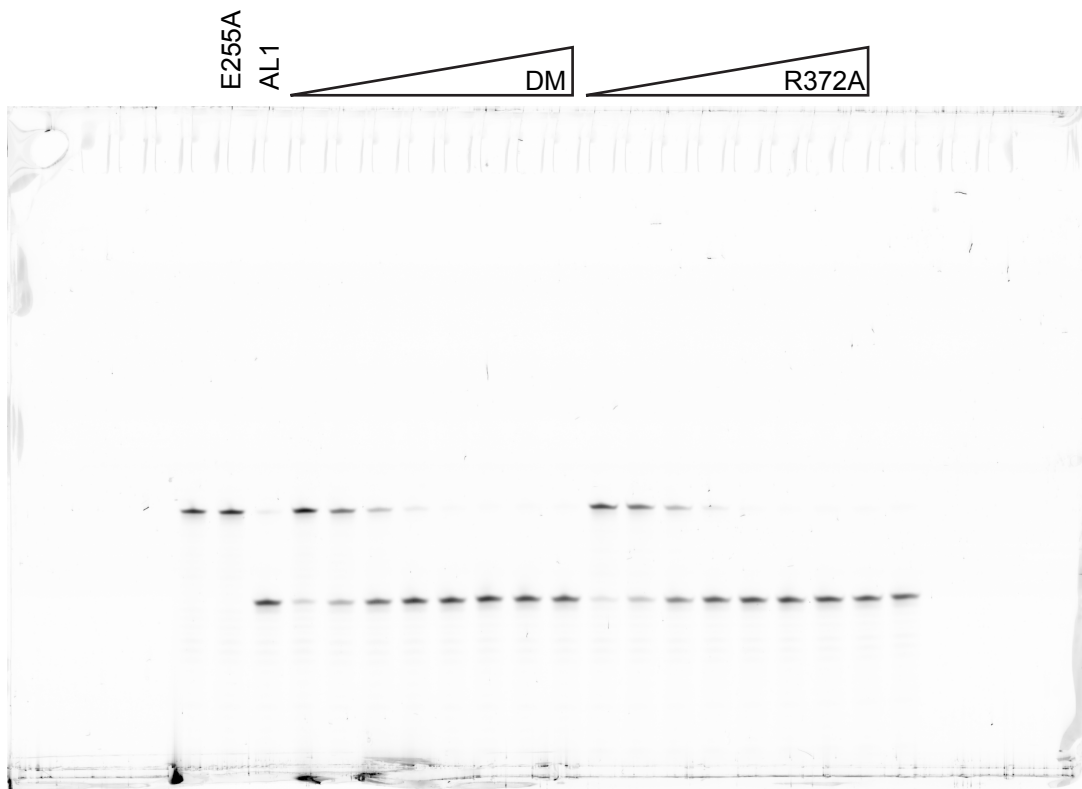

Supplement: 41598_2017_17694_MOESM4_ESM.pdf [file 41598_2017_17694_MOESM4_ESM.pdf]
